# Supplementary material
Source: publisher site journal article supplement (https://www.spandidos-publications.com/4617/downloadSupplementary)

Figure S1. PMA reduces the viability of HK-2 cells. The viability of HK-2 cells treated with different concentrations of PMA was detected using MTT assay. \*P<0.05, \*\*P<0.01 and \*\*\*P<0.001 vs. control. PMA, phorbol 12-myristate 13-acetate.

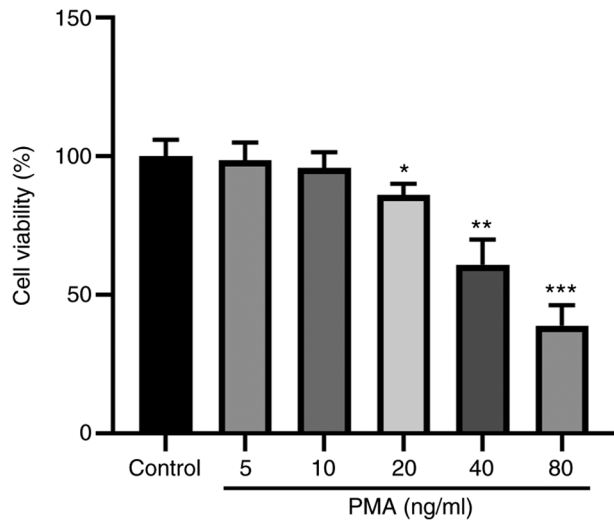

Supplement: Supplementary file 1 [file downloadSupplementary]
